# Supplementary material
Source: PubMed Central journal article supplement (PMC2148343)

Greater than 2 years' delay  
0 to 2 years' delay

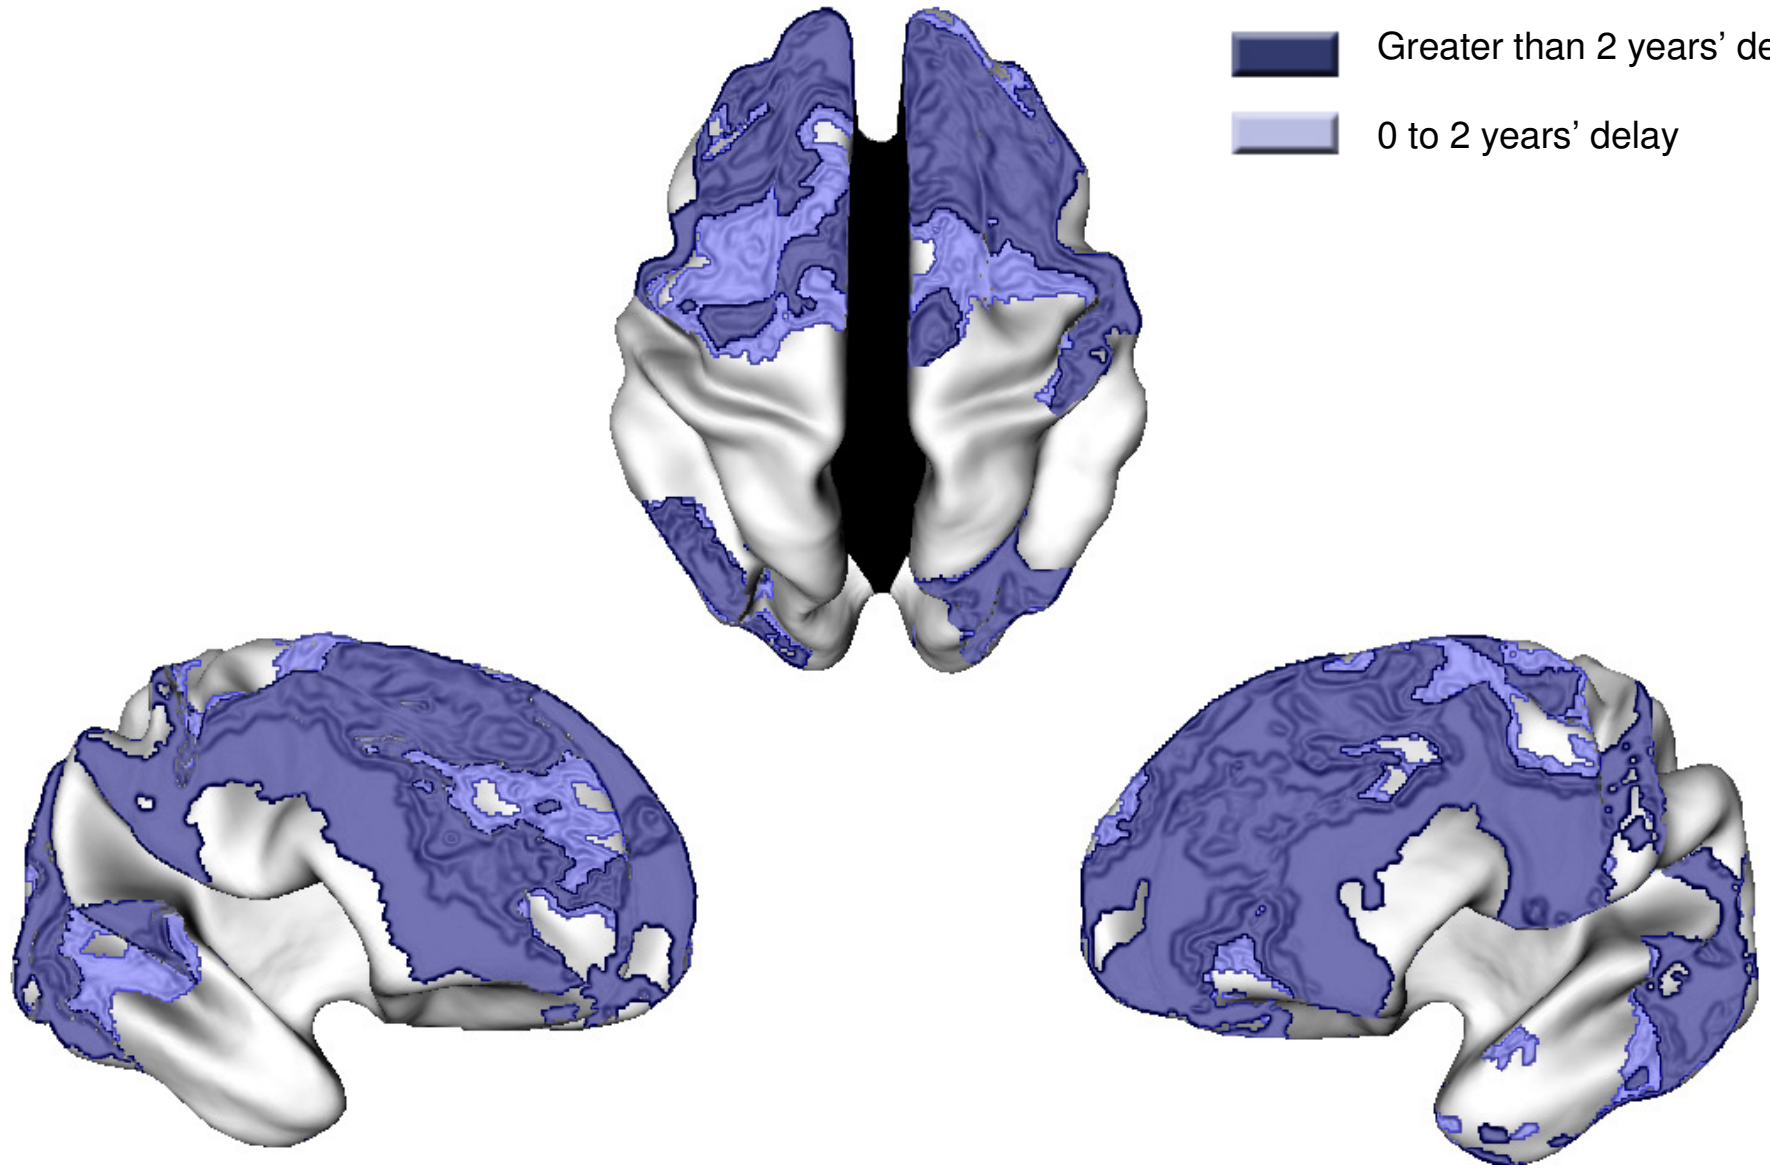

Supplement: pnas_0707741104_1.pdf [file pnas_0707741104_1.pdf]

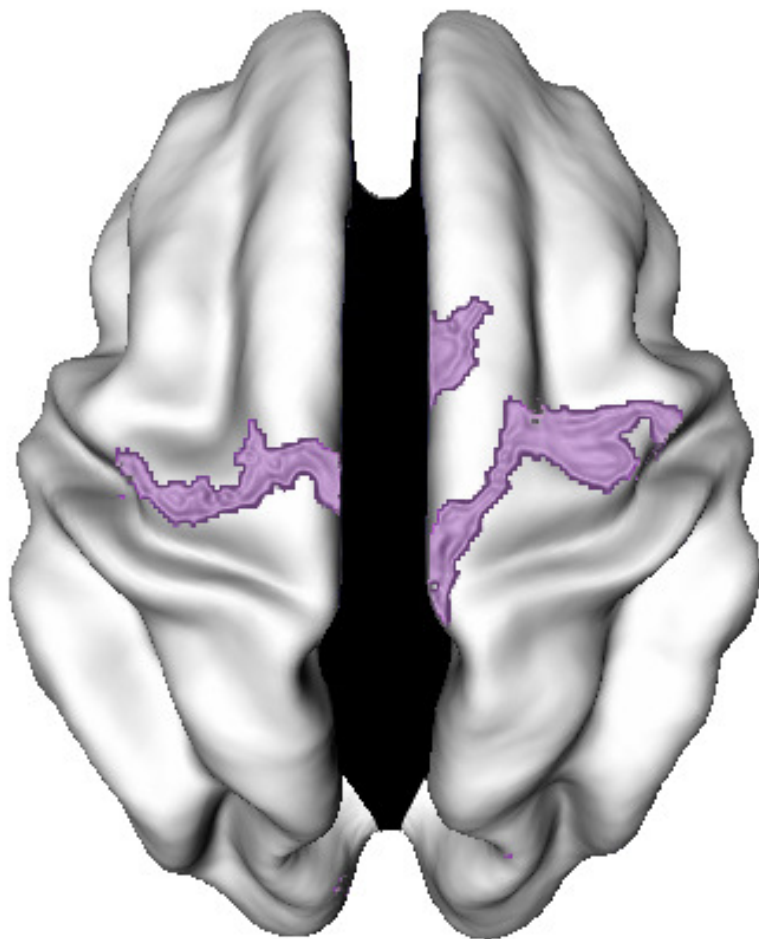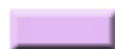

Regions where ADHD group had earlier peaks.

Supplement: pnas_0707741104_2.pdf [file pnas_0707741104_2.pdf]
